# Supplementary material
Source: publisher figshare collection journal article supplement (https://f1000.figshare.com/articles/dataset/_/106727)
Supplement: Supplementary file 2 [file 1]

|   | Group A | Group B | Group C | Group D | Group E | Group F |
|---|---------|---------|---------|---------|---------|---------|
|   |         |         |         |         |         |         |
|   | Y       | Y       | Y       | Y       | Y       | Y       |
| 1 | 2885    | 1162139 | 190274  | 605234  | 919231  | 1265555 |
| 2 | 7717    | 1538949 | 314892  | 575777  | 1302252 | 824574  |
| 3 | 3364    | 1364524 | 223391  | 710624  | 1079309 | 1485951 |
| 4 | 9038    | 3159213 | 369713  | 676036  | 1529040 | 968166  |
| 5 | 7274    | 1430297 | 296297  | 541767  | 1225314 | 775862  |
| 6 | 2331    | 941531  | 154149  | 490340  | 744733  | 1025316 |
| 7 | 6246    | 1489866 | 255111  | 466475  | 1055047 | 668044  |
| 8 | 5029    | 1193914 | 204455  | 373829  | 845476  | 535354  |

|   | Group G | Group H | Group I | Group J    | Group K    | Group L    |
|---|---------|---------|---------|------------|------------|------------|
|   |         |         |         | Data Set-J | Data Set-K | Data Set-L |
|   | Y       | Y       | Y       | Y          | Y          | Y          |
| 1 | 189126  | 212245  | 377087  | 312245     | 399238     | 176480     |
| 2 | 115550  | 468844  | 518956  | 468844     | 332272     | 483585     |
| 3 | 222043  | 249188  | 442741  | 366605     | 468749     | 207195     |
| 4 | 135652  | 550478  | 609319  | 550478     | 390121     | 567787     |
| 5 | 108735  | 441152  | 488304  | 441152     | 312651     | 455022     |
| 6 | 153219  | 171949  | 305501  | 252967     | 323446     | 142974     |
| 7 | 93610   | 379839  | 420440  | 379839     | 269193     | 391782     |
| 8 | 75037   | 304405  | 336939  | 304405     | 215739     | 313975     |

|   | Group M | Group N | Group O |
|---|---------|---------|---------|
|   |         |         |         |
|   | Y       | Y       | Y       |
| 1 | 399238  | 176480  | 251825  |
| 2 | 222272  | 183585  | 161380  |
| 3 | 468749  | 207195  | 295662  |
| 4 | 260962  | 215536  | 189464  |
| 5 | 209151  | 172749  | 151857  |
| 6 | 323446  | 142974  | 204016  |
| 7 | 180073  | 148729  | 130740  |
| 8 | 144324  | 119207  | 104791  |
