# Supplementary material
Source: publisher figshare collection journal article supplement (https://f1000.figshare.com/articles/dataset/_/106727)
Supplement: Supplementary file 3 [file 1]

|   | Group A | Group B | Group C | Group D | Group E | Group F |
|---|---------|---------|---------|---------|---------|---------|
|   |         |         |         |         |         |         |
|   | Y       | Y       | Y       | Y       | Y       | Y       |
| 1 | 3008    | 1715614 | 185615  | 193170  | 742924  | 935843  |
| 2 | 9172    | 1629552 | 197774  | 230974  | 1249544 | 2179774 |
| 3 | 3509    | 1614397 | 217920  | 226791  | 1107129 | 898814  |
| 4 | 10747   | 1913345 | 232197  | 271179  | 1867152 | 1972314 |
| 5 | 8643    | 1633273 | 186100  | 217338  | 1175720 | 980528  |
| 6 | 2431    | 1389943 | 150374  | 156496  | 763928  | 758191  |
| 7 | 7425    | 1320218 | 160225  | 187123  | 812344  | 1060906 |
| 8 | 5973    | 1657968 | 128419  | 149973  | 611257  | 590574  |

|   | Group G | Group H | Group I | Group J    | Group K    | Group L    |
|---|---------|---------|---------|------------|------------|------------|
|   |         |         |         | Data Set-J | Data Set-K | Data Set-L |
|   | Y       | Y       | Y       | Y          | Y          | Y          |
| 1 | 634840  | 1179867 | 380581  | 113586     | 200016     | 217705     |
| 2 | 186102  | 1091891 | 353954  | 190285     | 111463     | 106952     |
| 3 | 745386  | 1385339 | 446843  | 133346     | 234829     | 255600     |
| 4 | 218492  | 1282041 | 415579  | 223404     | 130853     | 125557     |
| 5 | 175118  | 1027383 | 333052  | 179054     | 104890     | 100645     |
| 6 | 514326  | 955894  | 308331  | 92018      | 162041     | 176373     |
| 7 | 150769  | 884618  | 286759  | 154158     | 90298      | 86644      |
| 8 | 120841  | 708904  | 229815  | 123557     | 72383      | 69455      |

|   | Group M | Group N | Group O |
|---|---------|---------|---------|
|   |         |         |         |
|   | Y       | Y       | Y       |
| 1 | 113586  | 260016  | 127705  |
| 2 | 100285  | 111463  | 106952  |
| 3 | 133346  | 305279  | 149925  |
| 4 | 117729  | 130853  | 125557  |
| 5 | 94372   | 104890  | 100645  |
| 6 | 92018   | 210652  | 103458  |
| 7 | 81242   | 90298   | 86644   |
| 8 | 65126   | 72383   | 69455   |
