# Supplementary material
Source: publisher figshare collection journal article supplement (https://f1000.figshare.com/articles/dataset/_/106727)
Supplement: Supplementary file 6 [file 1]

|   | Group A | Group B | Group C | Group D | Group E | Group F |
|---|---------|---------|---------|---------|---------|---------|
|   |         |         |         |         |         |         |
|   | Y       | Y       | Y       | Y       | Y       | Y       |
| 1 | 2806    | 1151252 | 212127  | 413593  | 341372  | 557038  |
| 2 | 9124    | 1329764 | 350702  | 393559  | 593914  | 2062737 |
| 3 | 3271    | 1351741 | 249049  | 485605  | 2153056 | 654033  |
| 4 | 10690   | 1561344 | 411760  | 462081  | 2871500 | 247809  |
| 5 | 8598    | 1251200 | 329991  | 370316  | 499741  | 1999952 |
| 6 | 2267    | 932711  | 171854  | 335077  | 319618  | 451293  |
| 7 | 7385    | 1077337 | 284124  | 318846  | 1991345 | 460998  |
| 8 | 5942    | 863338  | 227704  | 255528  | 534831  | 689976  |

|   | Group G | Group H | Group I | Group J    | Group K    | Group L    |
|---|---------|---------|---------|------------|------------|------------|
|   |         |         |         | Data Set-J | Data Set-K | Data Set-L |
|   | Y       | Y       | Y       | Y          | Y          | Y          |
| 1 | 144423  | 160799  | 393438  | 415599     | 202248     | 405183     |
| 2 | 238186  | 916716  | 539222  | 233750     | 535190     | 357187     |
| 3 | 169553  | 188782  | 461939  | 487960     | 237450     | 475730     |
| 4 | 279648  | 206688  | 633114  | 274439     | 628380     | 419374     |
| 5 | 224124  | 286196  | 507372  | 219950     | 503578     | 336093     |
| 6 | 117001  | 130269  | 318748  | 336702     | 163850     | 328263     |
| 7 | 192966  | 218625  | 436858  | 189372     | 433592     | 289378     |
| 8 | 154655  | 335485  | 350096  | 151775     | 347478     | 231914     |

|   | Group M | Group N | Group O |
|---|---------|---------|---------|
|   |         |         |         |
|   | Y       | Y       | Y       |
| 1 | 415599  | 202248  | 405183  |
| 2 | 333750  | 435190  | 257187  |
| 3 | 487960  | 237450  | 475730  |
| 4 | 391855  | 510963  | 301957  |
| 5 | 314041  | 409487  | 242002  |
| 6 | 336702  | 163850  | 328263  |
| 7 | 270390  | 352574  | 208360  |
| 8 | 216698  | 282556  | 166991  |
