# Supplementary material
Source: publisher figshare collection journal article supplement (https://f1000.figshare.com/articles/dataset/_/106727)
Supplement: Supplementary file 7 [file 1]

|   | Group A | Group B | Group C | Group D | Group E | Group F |
|---|---------|---------|---------|---------|---------|---------|
|   |         |         |         |         |         |         |
|   | Y       | Y       | Y       | Y       | Y       | Y       |
| 1 | 3401    | 1421121 | 203052  | 371265  | 958768  | 969718  |
| 2 | 7761    | 1335879 | 240515  | 432679  | 1200882 | 645948  |
| 3 | 3970    | 1668612 | 238395  | 435904  | 1125732 | 1138589 |
| 4 | 9090    | 1568524 | 282382  | 508015  | 1410015 | 758429  |
| 5 | 7315    | 1256954 | 226316  | 407124  | 1129934 | 607791  |
| 6 | 2749    | 1151352 | 164502  | 300784  | 776765  | 785636  |
| 7 | 6281    | 1082291 | 194853  | 350540  | 972920  | 523325  |
| 8 | 5057    | 867308  | 156167  | 280925  | 779664  | 419386  |

|   | Group G | Group H | Group I | Group J    | Group K    | Group L    |
|---|---------|---------|---------|------------|------------|------------|
|   |         |         |         | Data Set-J | Data Set-K | Data Set-L |
|   | Y       | Y       | Y       | Y          | Y          | Y          |
| 1 | 169144  | 314267  | 397086  | 287316     | 259193     | 272731     |
| 2 | 244147  | 395142  | 475275  | 344266     | 304750     | 286821     |
| 3 | 198581  | 368980  | 466223  | 337334     | 304313     | 320209     |
| 4 | 286646  | 463940  | 558030  | 404203     | 357804     | 336752     |
| 5 | 229733  | 371805  | 447204  | 323936     | 286755     | 269885     |
| 6 | 137030  | 254606  | 321703  | 232770     | 209986     | 220954     |
| 7 | 197795  | 320128  | 385050  | 278909     | 246894     | 232369     |
| 8 | 158525  | 256555  | 308580  | 223525     | 197870     | 186230     |

|   | Group M | Group N | Group O |
|---|---------|---------|---------|
|   |         |         |         |
|   | Y       | Y       | Y       |
| 1 | 287316  | 159193  | 172731  |
| 2 | 244266  | 304750  | 286821  |
| 3 | 337334  | 186896  | 202792  |
| 4 | 286786  | 357804  | 336752  |
| 5 | 229845  | 286755  | 269885  |
| 6 | 232770  | 128968  | 139936  |
| 7 | 197892  | 246894  | 232369  |
| 8 | 158602  | 197870  | 186230  |
